# Supplementary material for: Neural dynamics at successive stages of the ventral visual stream are consistent with hierarchical error signals
Source: eLife journal article supplement (doi:10.7554/elife.42870), 2018-11-28
Supplement: supp [file elife-42870-supp-v1.zip]

Archive with 2 entries (2 files):
- elife_poa_e42870_Transparent_Reporting_File.pdf
- elife_poa_e42870_Source_data_1.zip
