# Supplementary material for: Neural dynamics at successive stages of the ventral visual stream are consistent with hierarchical error signals
Source: eLife journal article supplement (doi:10.7554/elife.42870), 2018-11-28
Supplement: supp [file elife-42870-supp-v1.zip › elife_poa_e42870_Transparent_Reporting_File.pdf]

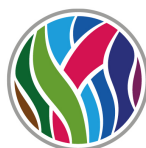

## **eLife's transparent reporting form**

We encourage authors to provide detailed information *within their submission* to facilitate the interpretation and replication of experiments. Authors can upload supporting documentation to indicate the use of appropriate reporting guidelines for health-related research (see [EQUATOR Network](#)), life science research (see the [BioSharing Information Resource](#)), or the [ARRIVE guidelines](#) for reporting work involving animal research. Where applicable, authors should refer to any relevant reporting standards documents in this form.

If you have any questions, please consult our Journal Policies and/or contact us: [editorial@elifesciences.org](mailto:editorial@elifesciences.org).

### **Sample-size estimation**

- You should state whether an appropriate sample size was computed when the study was being designed
- You should state the statistical method of sample size computation and any required assumptions
- If no explicit power analysis was used, you should describe how you decided what sample (replicate) size (number) to use

Please outline where this information can be found within the submission (e.g., sections or figure legends), or explain why this information doesn't apply to your submission:

No explicit power analysis was used to determine sample size. Results are reported for two subjects which matches our previous work and follows general practice in the field. The main finding was shown to be consistent across the two subjects tested (Figure 4A).

### **Replicates**

- You should report how often each experiment was performed
- You should include a definition of biological versus technical replication
- The data obtained should be provided and sufficient information should be provided to indicate the number of independent biological and/or technical replicates
- If you encountered any outliers, you should describe how these were handled
- Criteria for exclusion/inclusion of data should be clearly stated
- High-throughput sequence data should be uploaded before submission, with a private link for reviewers provided (these are available from both GEO and ArrayExpress)

Please outline where this information can be found within the submission (e.g., sections or figure legends), or explain why this information doesn't apply to your submission:

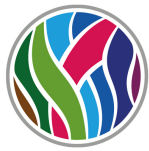

- The sample sizes for each experimental condition, which utilized different stimulus sets, are provided throughout the text.
- Biological replication is shown across the two subjects tested (Figure 4A). All stimulus conditions sample multiple neural sites (at least 15 sites tested) reporting median and standard error to indicate variability across site replicates.
- Technical replicates are the number of times (trial repetitions) a given stimulus was presented in an experiment at a neural site. This information is detailed in the Methods subsection “Behavioral training and image presentation.”
- Criteria for inclusion of neural sites are described in the first paragraph of Results.



### Statistical reporting

- Statistical analysis methods should be described and justified
- Raw data should be presented in figures whenever informative to do so (typically when N per group is less than 10)
- For each experiment, you should identify the statistical tests used, exact values of N, definitions of center, methods of multiple test correction, and dispersion and precision measures (e.g., mean, median, SD, SEM, confidence intervals; and, for the major substantive results, a measure of effect size (e.g., Pearson's  $r$ , Cohen's  $d$ ))
- Report exact p-values wherever possible alongside the summary statistics and 95% confidence intervals. These should be reported for all key questions and not only when the p-value is less than 0.05.

Please outline where this information can be found within the submission (e.g., sections or figure legends), or explain why this information doesn't apply to your submission:

- Statistical analysis is reported in the final paragraph titled "Statistics" in the Methods section.
- All N per group were > 10. Individual example data samples are shown in Figure 2.
- In general, all statistical comparisons were done by bootstrap resampling as described in "Statistics" under Methods section. Sample sizes, medians and standard errors are consistently reported inline throughout the text for each condition.
- P-values up to the third decimal place are consistently reported inline throughout the text for each statistical comparison.

(For large datasets, or papers with a very large number of statistical tests, you may upload a single table file with tests, Ns, etc., with reference to sections in the manuscript.)

### Group allocation

- Indicate how samples were allocated into experimental groups (in the case of clinical studies, please specify allocation to treatment method); if randomization was used, please also state if restricted randomization was applied
- Indicate if masking was used during group allocation, data collection and/or data analysis

Please outline where this information can be found within the submission (e.g., sections or figure legends), or explain why this information doesn't apply to your submission:

Our study design did not utilize experimental groups. Our study utilized only two experimental subjects and sampled groups of neurons (populations) from those subjects.  
Division of neurons into groups was based on brain area as described in Results paragraph 1 and illustrated in Figure 1A,B.

### Additional data files ("source data")

- We encourage you to upload relevant additional data files, such as numerical data that are represented as a graph in a figure, or as a summary table
- Where provided, these should be in the most useful format, and they can be uploaded as "Source data" files linked to a main figure or table



- Include model definition files including the full list of parameters used
- Include code used for data analysis (e.g., R, MatLab)
- Avoid stating that data files are “available upon request”

Please indicate the figures or tables for which source data files have been provided:

Source data are provided for data Figures 1-5.  
Model code in Matlab is provided for modeling Figures 5 & 6.
